# Supplementary material for: Single cell RNA sequencing identifies an early monocyte gene signature in acute respiratory distress syndrome
Source: JCI journal article supplement (doi:10.1172/jci.insight.135678), 2020-06-18
Supplement: sd1 [file 1]

## **SUPPLEMENTAL DATA LIST**

**Supplemental Figure 1. scRNA-seq quality control.**

**Supplemental Figure 2. Individual patient UMAP plots and cell cycle analysis.**

**Supplemental Figure 3. Proportion of monocyte clusters in sepsis only and sepsis+ARDS patients.**

**Supplemental Figure 4. Expression of *SOCS1* and IFN receptors in the monocyte clusters.**

**Supplemental Table 1. Cell count for each cell cluster stratified by sample.**

**Supplemental Table 2. Marker genes used for each cell cluster.**

**Supplemental Table 3. Differential gene expression in all cells.**

**Supplemental Table 4. ClueGO pathway enrichment associated with down-regulated genes in NK cells.**

**Supplemental Table 5. ClueGO pathway enrichment associated with up-regulated genes in each monocyte subpopulation.**

**Supplemental Table 6. Differential expression of the 29 genes used for bulk data validation in monocytes from scRNA-seq analysis.**

**Supplemental Table 7. Description of datasets used for score generation.**

**Supplemental Table 8. Reagents and materials.**

**A**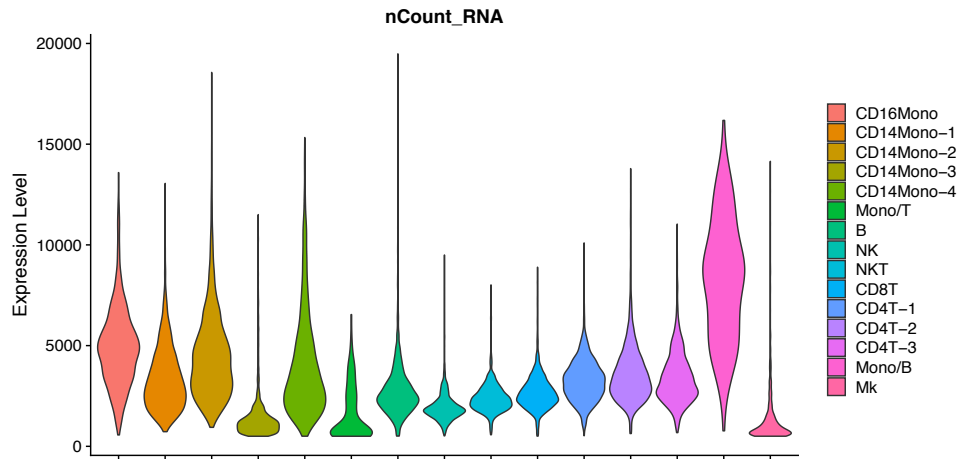**B**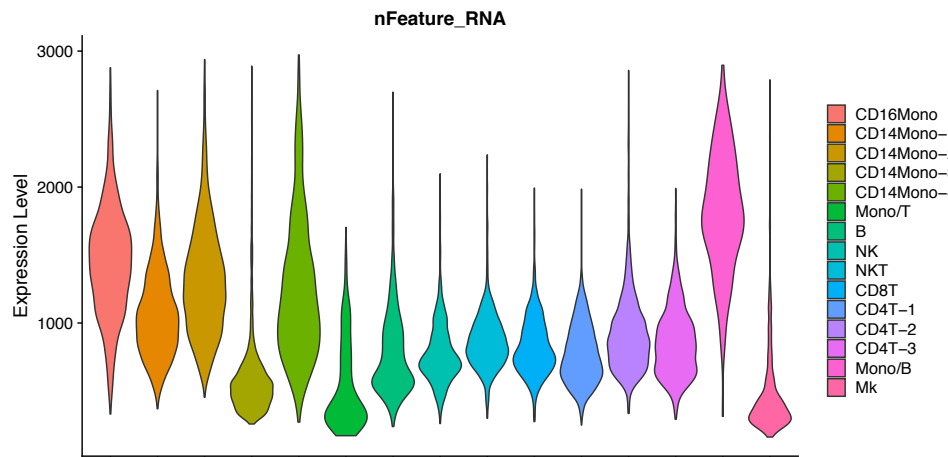**C**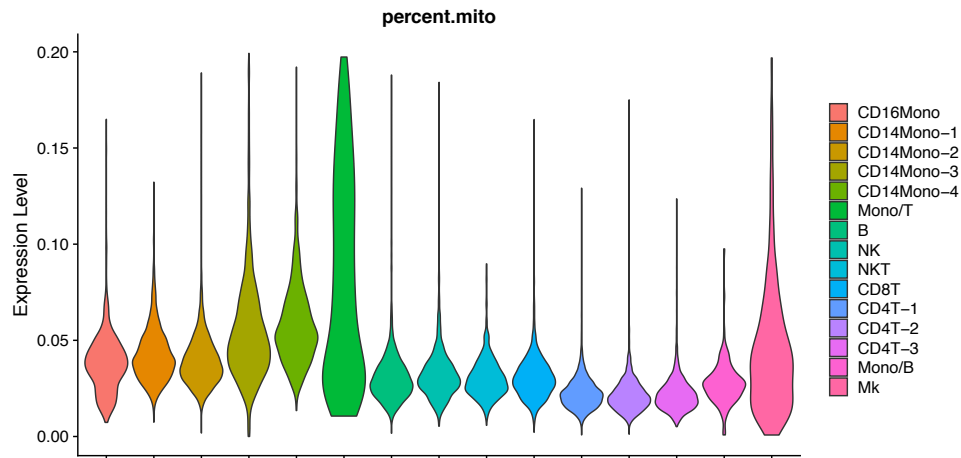

**Supplemental Figure 1. scRNA-seq quality control.** Violin plots of (A) total UMI count, (B) numbers of unique genes identified, and (C) proportion of mitochondrial genes in each cell cluster.

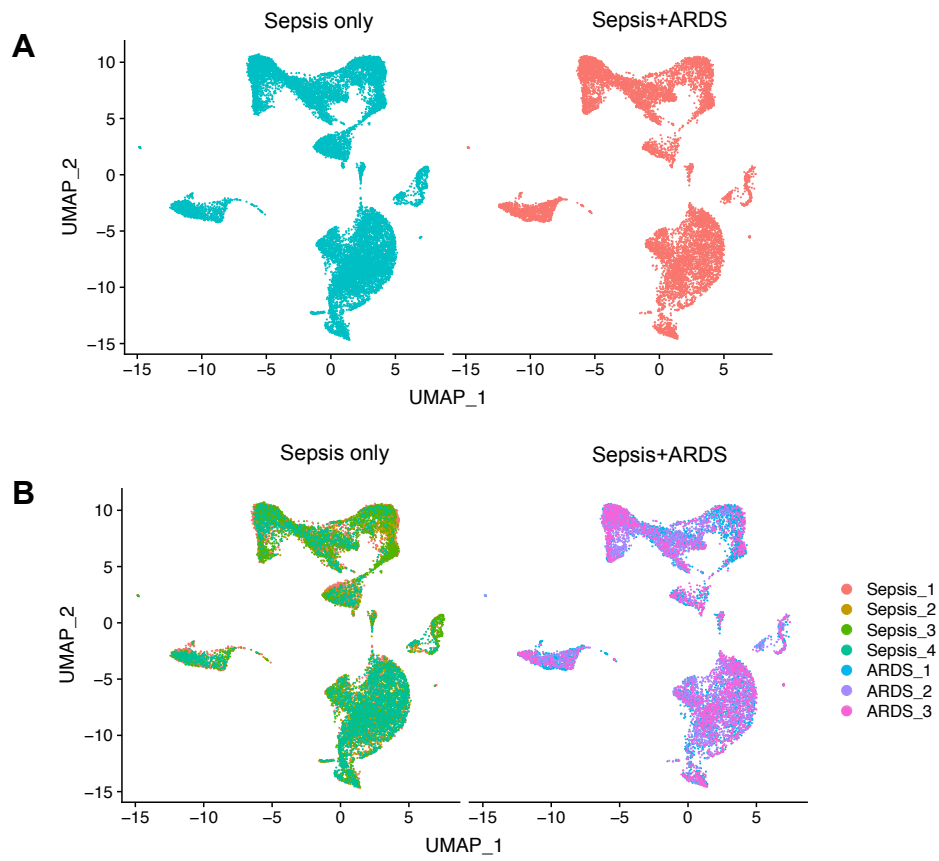

**Supplemental Figure 2. Individual patient UMAP plots.** Low dimension UMAP plot of PBMC by (a) group and (b) individual patients.

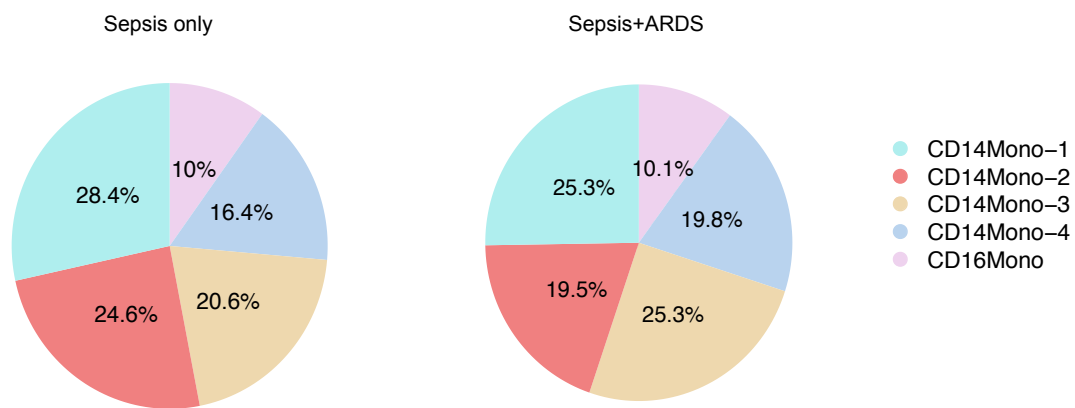

**Supplemental Figure 3. Proportion of monocyte clusters in sepsis only and sepsis+ARDS patients.** The proportion of each color-coded monocyte cluster in sepsis only and sepsis+ARDS patients is shown in the pie charts.

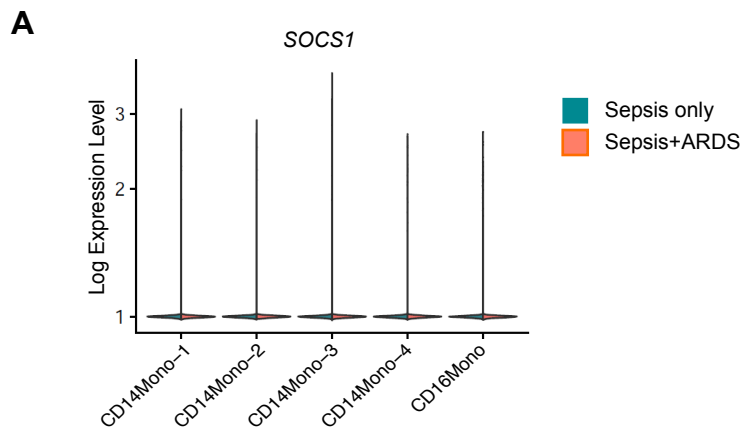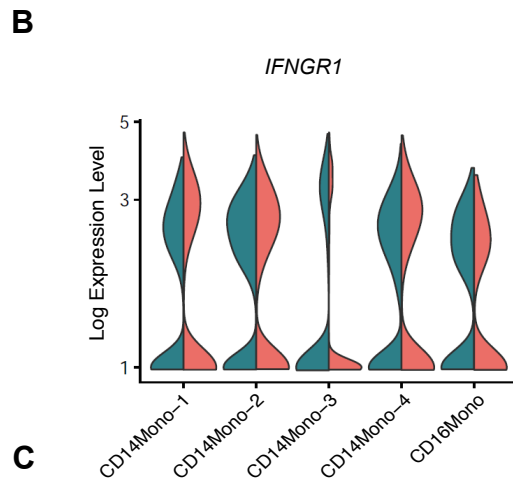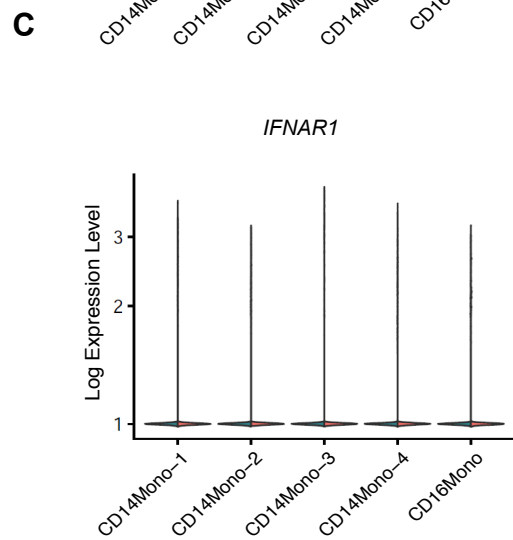

**Supplemental Figure 4. Expression of *SOCS1* and IFN receptors in the monocyte clusters.** Violin plots showing (a) *SOCS1*, (b) *IFNGR1*, and (c) *IFNAR1* expression in each monocyte cluster in sepsis only and sepsis+ARDS patients.

Supplemental Table 1. Cell count for each cell cluster stratified by sample

|            | Sepsis1 | Sepsis2 | Sepsis3 | Sepsis4 | ARDS1 | ARDS2 | ARDS3 |
|------------|---------|---------|---------|---------|-------|-------|-------|
| Mk         | 66      | 44      | 211     | 37      | 73    | 56    | 49    |
| Mono/B     | 24      | 35      | 14      | 24      | 23    | 15    | 8     |
| CD4T-3     | 187     | 69      | 252     | 119     | 245   | 228   | 45    |
| CD4T-2     | 396     | 231     | 415     | 232     | 360   | 415   | 134   |
| CD4T-1     | 611     | 208     | 693     | 268     | 339   | 652   | 349   |
| CD8T       | 560     | 346     | 538     | 125     | 423   | 156   | 129   |
| NKT        | 103     | 192     | 290     | 25      | 379   | 12    | 99    |
| NK         | 537     | 242     | 244     | 163     | 198   | 54    | 119   |
| B          | 421     | 19      | 252     | 295     | 594   | 359   | 135   |
| Mono/T     | 82      | 21      | 89      | 14      | 36    | 19    | 42    |
| CD14Mono-4 | 236     | 259     | 219     | 338     | 276   | 361   | 148   |
| CD14Mono-3 | 258     | 366     | 156     | 539     | 296   | 422   | 281   |
| CD14Mono-2 | 171     | 629     | 125     | 654     | 282   | 329   | 161   |
| CD14Mono-1 | 178     | 554     | 203     | 888     | 369   | 393   | 237   |
| CD16Mono   | 113     | 136     | 151     | 239     | 225   | 80    | 95    |
|            |         |         |         |         |       |       |       |
| SUM        | 3943    | 3351    | 3852    | 3960    | 4118  | 3551  | 2031  |

Supplemental Table 2. Marker genes used for each cell cluster

| # Top 10 marker genes for each cluster |          |          |          |          |         |            |           |              |          |         |
|----------------------------------------|----------|----------|----------|----------|---------|------------|-----------|--------------|----------|---------|
| CD14Mono-1                             | S100A9   | S100A8   | S100A12  | LYZ      | LGALS1  | TSPO       | CTSD      | S100A6       | CSTA     | RETN    |
| CD14Mono-2                             | TIMP1    | G0S2     | CST3     | TYROBP   | AIF1    | CTSS       | THBS1     | FCN1         | SNHG15   | MAP3K8  |
| CD14Mono-3                             | S100A8   | S100A12  | NAMPT    | RETN     | CTSD    | S100P      | LGALS1    | BCL2A1       | GLUL     | CXCL8   |
| CD14Mono-4                             | PPBP     | GNG11    | MAP3K8   | SLC25A37 | THBS1   | HIF1A      | G0S2      | CLEC7A       | SOD2     | VCAN    |
| CD8T                                   | CMC1     | DUSP2    | GZMK     | CCL5     | CD8A    | CD3D       | JUN       | APOBEC3G     | CD3E     | TRBC2   |
| CD4T-1*                                | CCR7     | PIK3IP1  | LEPROTL1 | RPS6     | SARAF   | SOCS3      | RPS12     | IL7R         | RPLP0    | RPSA    |
| CD4T-3                                 | RPS6     | SARAF    | LEPROTL1 | CCR7     | CD6     | IL7R       | PIK3IP1   | LTB          | SPOCK2   | ZFP36L2 |
| B                                      | HLA-DQB1 | CD79A    | CD74     | IGKC     | HLA-DRA | IGLC2      | HLA-DPB1  | IGHM         | HLA-DRB1 | IGHA1   |
| NK                                     | GNLY     | NKG7     | GZMB     | CCL3     | FGFBP2  | CTSW       | KLRB1     | SPON2        | CD7      | CCL4    |
| NKT                                    | GZMH     | GNLY     | NKG7     | CCL5     | CCL4    | FGFBP2     | CST7      | CMC1         | GZMA     | KLRB1   |
| CD16Mono                               | IFITM2   | IFITM3   | LILRA1   | LST1     | COTL1   | C10orf54   | RHOC      | IRF7         | PSAP     | CD68    |
| Mk                                     | PF4      | PPBP     | GNG11    | GP9      | ITGA2B  | SDPR       | HIST1H2AC | RGS18        | TSC22D1  | ACRBP   |
| Mono/T                                 | MT-CO2   | MT-CO3   | MT-ATP6  | MT-ND1   | TSPYL2  | AC016831.7 | SPOCK2    | RP11-138A9.1 | KLF6     | TRAC    |
| Mono/B                                 | HLA-DPA1 | HLA-DPB1 | CD74     | HLA-DRA  | HLA-DMA | HLA-DRB1   | HLA-DQA1  | HLA-DQB1     | AREG     | PTGDS   |

\*the marker genes for CD4T-2 cluster show the same list as CD4T-1 in global differentiation.

Supplemental Table 3. Differential gene expression in all cells

| Gene      | avg_logFC | Sepsis only % | Sepsis+ARDS% | p_val mast | p_val adj mast |
|-----------|-----------|---------------|--------------|------------|----------------|
| IGLC2     | 0.685     | 0.384         | 0.278        | 4.35E-68   | 8.70E-65       |
| CD79A     | 0.293     | 0.598         | 0.552        | 1.00E-43   | 2.00E-40       |
| HLA-DQB1  | 0.260     | 0.914         | 0.665        | 0.00E+00   | 0.00E+00       |
| IGHA1     | 0.250     | 0.795         | 0.583        | 1.52E-270  | 3.03E-267      |
| CD74      | 0.224     | 0.864         | 0.759        | 1.31E-98   | 2.62E-95       |
| HLA-DRA   | 0.212     | 0.844         | 0.726        | 1.81E-109  | 3.63E-106      |
| HLA-DPB1  | 0.199     | 0.833         | 0.69         | 2.59E-148  | 5.18E-145      |
| IGHM      | 0.167     | 0.439         | 0.476        | 1.67E-66   | 3.33E-63       |
| MS4A1     | 0.161     | 0.546         | 0.506        | 1.09E-39   | 2.18E-36       |
| EZR       | 0.159     | 0.832         | 0.763        | 2.24E-43   | 4.47E-40       |
| HLA-DRB1  | 0.153     | 0.805         | 0.665        | 8.97E-142  | 1.79E-138      |
| IGLC3     | 0.151     | 0.337         | 0.21         | 2.00E-106  | 4.00E-103      |
| KLF2      | 0.127     | 0.754         | 0.648        | 3.58E-70   | 7.17E-67       |
| IFNGR2    | 0.126     | 0.73          | 0.641        | 4.60E-52   | 9.20E-49       |
| NAMPT     | 0.121     | 0.922         | 0.791        | 2.31E-223  | 4.63E-220      |
| IFI44L    | 0.120     | 0.418         | 0.36         | 0.00E+00   | 0.00E+00       |
| LTB       | 0.118     | 0.749         | 0.681        | 1.23E-39   | 2.45E-36       |
| CD83      | 0.114     | 0.89          | 0.726        | 1.41E-229  | 2.82E-226      |
| TSC22D3   | 0.112     | 0.975         | 0.928        | 6.13E-64   | 1.23E-60       |
| TNFRSF13C | 0.111     | 0.728         | 0.627        | 8.16E-74   | 1.63E-70       |
| CXCR4     | 0.110     | 0.98          | 0.942        | 1.24E-51   | 2.47E-48       |
| RGS2      | 0.109     | 0.766         | 0.692        | 1.77E-39   | 3.54E-36       |
| GLUL      | 0.108     | 0.799         | 0.681        | 1.60E-121  | 3.21E-118      |
| HLA-DPA1  | 0.107     | 0.76          | 0.629        | 1.49E-111  | 2.98E-108      |
| VNN2      | 0.104     | 0.441         | 0.463        | 5.55E-13   | 1.11E-09       |
| ATP6V0B   | 0.102     | 0.738         | 0.641        | 1.25E-90   | 2.50E-87       |
| MAFF      | -0.101    | 0.931         | 0.696        | 0.00E+00   | 0.00E+00       |
| TMSB4X    | -0.102    | 0.999         | 0.998        | 4.44E-28   | 8.88E-25       |
| XCL2      | -0.110    | 0.882         | 0.748        | 2.16E-169  | 4.33E-166      |
| CD7       | -0.111    | 0.8           | 0.716        | 1.64E-81   | 3.27E-78       |
| PPBP      | -0.118    | 0.799         | 0.678        | 1.19E-107  | 2.39E-104      |
| RGS18     | -0.119    | 0.725         | 0.642        | 8.84E-45   | 1.77E-41       |
| GP9       | -0.121    | 0.583         | 0.516        | 1.19E-26   | 2.38E-23       |
| GZMH      | -0.122    | 0.81          | 0.678        | 3.30E-156  | 6.60E-153      |
| PF4       | -0.127    | 0.862         | 0.687        | 1.44E-247  | 2.89E-244      |
| CCL5      | -0.131    | 0.894         | 0.782        | 8.82E-169  | 1.76E-165      |
| AREG      | -0.132    | 0.937         | 0.673        | 0.00E+00   | 0.00E+00       |
| KLRD1     | -0.135    | 0.75          | 0.619        | 3.34E-130  | 6.67E-127      |
| GZMA      | -0.140    | 0.731         | 0.645        | 3.22E-67   | 6.44E-64       |
| MT2A      | -0.145    | 0.906         | 0.86         | 8.69E-77   | 1.74E-73       |
| CST7      | -0.170    | 0.822         | 0.729        | 2.45E-105  | 4.91E-102      |
| GZMB      | -0.173    | 0.731         | 0.661        | 1.25E-51   | 2.49E-48       |
| CCL4      | -0.189    | 0.884         | 0.732        | 6.85E-230  | 1.37E-226      |
| KLRB1     | -0.200    | 0.764         | 0.68         | 4.36E-64   | 8.73E-61       |
| SPON2     | -0.201    | 0.874         | 0.696        | 7.01E-292  | 1.40E-288      |
| CTSW      | -0.209    | 0.514         | 0.466        | 8.62E-38   | 1.72E-34       |
| CMC1      | -0.238    | 0.774         | 0.657        | 5.17E-126  | 1.03E-122      |
| DUSP2     | -0.238    | 0.908         | 0.778        | 1.75E-223  | 3.50E-220      |
| FGFBP2    | -0.249    | 0.859         | 0.695        | 1.33E-257  | 2.66E-254      |
| NKG7      | -0.274    | 0.875         | 0.778        | 4.55E-155  | 9.11E-152      |
| PTGDS     | -0.283    | 0.761         | 0.629        | 4.74E-127  | 9.47E-124      |
| CCL3      | -0.326    | 0.908         | 0.735        | 8.92E-297  | 1.78E-293      |
| GNLY      | -0.347    | 0.817         | 0.767        | 3.15E-51   | 6.31E-48       |



Supplemental Table 4. ClueGO pathway enrichment associated with down-regulated genes in NK cells

| GOID       | GO Term                                                            | Term PValue | Term PValue Corrected with Bonferroni step down | Group PValue | Group PValue Corrected with Bonferroni step down | GO Groups | Associated Genes Found                                                                                                      |
|------------|--------------------------------------------------------------------|-------------|-------------------------------------------------|--------------|--------------------------------------------------|-----------|-----------------------------------------------------------------------------------------------------------------------------|
| GO:0002576 | platelet degranulation                                             | 3.56E-05    | 3.31E-03                                        | 3.56E-05     | 2.14E-04                                         | Group00   | [APLP2, CD63, GSTP1, IER3, PSAP, TIMP1, TUBA4A]                                                                             |
| GO:0043124 | negative regulation of I-kappaB kinase/NF-kappaB signaling         | 5.07E-05    | 4.61E-03                                        | 5.07E-05     | 2.03E-04                                         | Group01   | [BIRC3, GSTP1, RHOA, RIOK3, TNFAIP3]                                                                                        |
| GO:0046632 | alpha-beta T cell differentiation                                  | 4.28E-05    | 3.94E-03                                        | 4.28E-05     | 2.14E-04                                         | Group02   | [NFKBIZ, PRDM1, PTGER4, RHOA, TCF7, ZNF683]                                                                                 |
| GO:0008347 | glial cell migration                                               | 1.99E-06    | 2.01E-04                                        | 1.99E-06     | 1.60E-05                                         | Group03   | [BIRC3, CCL3, CCL4, GPX4, IDH2, TSPO]                                                                                       |
| GO:0010951 | negative regulation of endopeptidase activity                      | 8.93E-06    | 8.93E-04                                        | 8.93E-06     | 6.25E-05                                         | Group04   | [APLP2, BIN1, BIRC3, CST7, GSTP1, HERPUD1, SERPINB1, SPOCK2, TIMP1, TNFRSF1B]                                               |
| GO:0031663 | lipopolysaccharide-mediated signaling pathway                      | 7.34E-05    | 6.31E-03                                        | 7.34E-05     | 2.20E-04                                         | Group05   | [CCL3, CCL4, NFKBIA, PRDM1, TNFAIP3]                                                                                        |
| GO:0043407 | negative regulation of MAP kinase activity                         | 2.61E-05    | 2.48E-03                                        | 9.63E-05     | 9.63E-05                                         | Group06   | [BIRC3, DUSP1, DUSP2, GSTP1, KLF6, RGS2]                                                                                    |
| GO:0071901 | negative regulation of protein serine/threonine kinase activity    | 9.63E-05    | 7.99E-03                                        | 9.63E-05     | 9.63E-05                                         | Group06   | [BIRC3, DUSP1, DUSP2, GSTP1, KLF6, RGS2, TNFAIP3]                                                                           |
| GO:0071216 | cellular response to biotic stimulus                               | 1.50E-10    | 1.59E-08                                        | 8.36E-12     | 8.36E-11                                         | Group07   | [BIRC3, CCL3, CCL4, CEBPB, GSTP1, HSPA5, IRF8, NFKBIA, PRDM1, RHOA, TNFAIP3, TNFRSF1B, TSPO, ZFP36]                         |
| GO:0002237 | response to molecule of bacterial origin                           | 3.58E-11    | 3.83E-09                                        | 8.36E-12     | 8.36E-11                                         | Group07   | [BIRC3, CCL3, CCL4, CEBPB, FOS, GSTP1, IRF8, JUN, JUNB, NFKBIA, PRDM1, PTGER4, RHOA, TIMP1, TNFAIP3, TNFRSF1B, TSPO, ZFP36] |
| GO:0032496 | response to lipopolysaccharide                                     | 1.60E-11    | 1.73E-09                                        | 8.36E-12     | 8.36E-11                                         | Group07   | [BIRC3, CCL3, CCL4, CEBPB, FOS, GSTP1, IRF8, JUN, JUNB, NFKBIA, PRDM1, PTGER4, RHOA, TIMP1, TNFAIP3, TNFRSF1B, TSPO, ZFP36] |
| GO:0071219 | cellular response to molecule of bacterial origin                  | 6.18E-10    | 6.43E-08                                        | 8.36E-12     | 8.36E-11                                         | Group07   | [BIRC3, CCL3, CCL4, CEBPB, GSTP1, IRF8, NFKBIA, PRDM1, RHOA, TNFAIP3, TNFRSF1B, TSPO, ZFP36]                                |
| GO:0071222 | cellular response to lipopolysaccharide                            | 3.16E-10    | 3.32E-08                                        | 8.36E-12     | 8.36E-11                                         | Group07   | [BIRC3, CCL3, CCL4, CEBPB, GSTP1, IRF8, NFKBIA, PRDM1, RHOA, TNFAIP3, TNFRSF1B, TSPO, ZFP36]                                |
| GO:0046683 | response to organophosphorus                                       | 6.30E-05    | 5.61E-03                                        | 9.24E-05     | 1.85E-04                                         | Group08   | [DUSP1, FOS, HSP90B1, HSPA5, JUN, JUNB, ZFP36L1]                                                                            |
| GO:0071241 | cellular response to inorganic substance                           | 8.14E-05    | 6.92E-03                                        | 9.24E-05     | 1.85E-04                                         | Group08   | [ALOX5AP, FOS, HSPA5, JUN, JUNB, MT2A, RHOA, TSPO]                                                                          |
| GO:0014074 | response to purine-containing compound                             | 1.16E-04    | 9.39E-03                                        | 9.24E-05     | 1.85E-04                                         | Group08   | [DUSP1, FOS, HSP90B1, HSPA5, JUN, JUNB, ZFP36L1]                                                                            |
| GO:0051591 | response to cAMP                                                   | 7.01E-05    | 6.17E-03                                        | 9.24E-05     | 1.85E-04                                         | Group08   | [DUSP1, FOS, HSPA5, JUN, JUNB, ZFP36L1]                                                                                     |
| GO:0051592 | response to calcium ion                                            | 5.88E-05    | 5.30E-03                                        | 9.24E-05     | 1.85E-04                                         | Group08   | [ALOX5AP, DUSP1, FOS, HSPA5, JUN, JUNB, RHOA]                                                                               |
| GO:0071248 | cellular response to metal ion                                     | 2.96E-05    | 2.78E-03                                        | 9.24E-05     | 1.85E-04                                         | Group08   | [ALOX5AP, FOS, HSPA5, JUN, JUNB, MT2A, RHOA, TSPO]                                                                          |
| GO:0071277 | cellular response to calcium ion                                   | 1.50E-05    | 1.47E-03                                        | 9.24E-05     | 1.85E-04                                         | Group08   | [ALOX5AP, FOS, HSPA5, JUN, JUNB, RHOA]                                                                                      |
| GO:0043900 | regulation of multi-organism process                               | 3.24E-08    | 3.30E-06                                        | 6.35E-08     | 5.71E-07                                         | Group09   | [BIRC3, CCL3, CCL4, IFITM1, IRF8, JUN, PFN1, PRDM1, PRF1, PTGDS, RIOK3, SNX3, TIMP1, TNFAIP3, ZFP36]                        |
| GO:0043901 | negative regulation of multi-organism process                      | 1.21E-09    | 1.24E-07                                        | 6.35E-08     | 5.71E-07                                         | Group09   | [CCL3, CCL4, IFITM1, IRF8, JUN, PRDM1, PTGDS, RIOK3, SNX3, TIMP1, TNFAIP3, ZFP36]                                           |
| GO:0043903 | regulation of symbiosis, encompassing mutualism through parasitism | 7.11E-05    | 6.19E-03                                        | 6.35E-08     | 5.71E-07                                         | Group09   | [CCL3, CCL4, IFITM1, IRF8, JUN, PFN1, SNX3, ZFP36]                                                                          |
| GO:0048525 | negative regulation of viral process                               | 2.61E-05    | 2.48E-03                                        | 6.35E-08     | 5.71E-07                                         | Group09   | [CCL3, CCL4, IFITM1, JUN, SNX3, ZFP36]                                                                                      |
| GO:0019080 | viral gene expression                                              | 8.73E-05    | 7.34E-03                                        | 6.35E-08     | 5.71E-07                                         | Group09   | [CCL3, CCL4, JUN, PFN1, ZFP36]                                                                                              |
| GO:0019083 | viral transcription                                                | 1.85E-05    | 1.80E-03                                        | 6.35E-08     | 5.71E-07                                         | Group09   | [CCL3, CCL4, JUN, PFN1, ZFP36]                                                                                              |
| GO:0032897 | negative regulation of viral transcription                         | 2.17E-05    | 2.08E-03                                        | 6.35E-08     | 5.71E-07                                         | Group09   | [CCL3, CCL4, JUN, ZFP36]                                                                                                    |
| GO:0046782 | regulation of viral transcription                                  | 1.33E-05    | 1.31E-03                                        | 6.35E-08     | 5.71E-07                                         | Group09   | [CCL3, CCL4, JUN, PFN1, ZFP36]                                                                                              |
| GO:0043922 | negative regulation by host of viral transcription                 | 1.14E-04    | 9.37E-03                                        | 6.35E-08     | 5.71E-07                                         | Group09   | [CCL3, CCL4, JUN]                                                                                                           |

Supplemental Table 5. Enriched pathways and up-regulated genes in each monocyte subpopulation

| GOID              | GOTerm                                                                       | Term PValue | Term PValue Corrected with Bonferroni step down | Group PValue | Group PValue Corrected with Bonferroni step down | GOGroups | Associated Genes Found                                                                                                                       |
|-------------------|------------------------------------------------------------------------------|-------------|-------------------------------------------------|--------------|--------------------------------------------------|----------|----------------------------------------------------------------------------------------------------------------------------------------------|
| <b>CD14Mono-1</b> |                                                                              |             |                                                 |              |                                                  |          |                                                                                                                                              |
| GO:0051607        | defense response to virus                                                    | 4.85E-06    | 3.15E-04                                        | 4.85E-06     | 9.69E-06                                         | Group0   | [GBP1, IFI44L, IFIT2, IFIT3, IFITM1, IRF7, RNASE2, SAMHD1, SEC14L1, UNC93B1]                                                                 |
| GO:0034340        | response to type I interferon                                                | 4.33E-05    | 2.73E-03                                        | 4.33E-05     | 4.33E-05                                         | Group1   | [GBP2, IFIT2, IFIT3, IFITM1, IRF7, SAMHD1]                                                                                                   |
| GO:0071357        | cellular response to type I interferon                                       | 3.12E-05    | 2.00E-03                                        | 4.33E-05     | 4.33E-05                                         | Group1   | [GBP2, IFIT2, IFIT3, IFITM1, IRF7, SAMHD1]                                                                                                   |
| GO:0060337        | type I interferon signaling pathway                                          | 3.12E-05    | 2.00E-03                                        | 4.33E-05     | 4.33E-05                                         | Group1   | [GBP2, IFIT2, IFIT3, IFITM1, IRF7, SAMHD1]                                                                                                   |
| <b>CD14Mono-2</b> |                                                                              |             |                                                 |              |                                                  |          |                                                                                                                                              |
| GO:0002576        | platelet degranulation                                                       | 2.66E-06    | 4.52E-05                                        | 2.66E-06     | 2.13E-05                                         | Group0   | [ITGA2B, PECAM1, PLEK, PPBP, SERPING1, SPARC, VCL]                                                                                           |
| GO:0003229        | ventricular cardiac muscle tissue development                                | 2.74E-03    | 5.49E-03                                        | 2.74E-03     | 5.49E-03                                         | Group1   | [HERPUD1, ID2, PPBP]                                                                                                                         |
| GO:0090502        | RNA phosphodiester bond hydrolysis, endonucleolytic                          | 5.25E-03    | 5.25E-03                                        | 5.25E-03     | 5.25E-03                                         | Group2   | [RNASE1, RNASE2, RNASET2]                                                                                                                    |
| GO:0071295        | cellular response to vitamin                                                 | 8.35E-04    | 6.68E-03                                        | 8.35E-04     | 3.34E-03                                         | Group3   | [ATP2B1, BACH1, PPBP]                                                                                                                        |
| GO:2000257        | regulation of protein activation cascade                                     | 1.34E-03    | 5.36E-03                                        | 1.34E-03     | 4.02E-03                                         | Group4   | [C1QB, C3AR1, IGKC, SERPING1]                                                                                                                |
| GO:0030449        | regulation of complement activation                                          | 1.23E-03    | 6.15E-03                                        | 1.34E-03     | 4.02E-03                                         | Group4   | [C1QB, C3AR1, IGKC, SERPING1]                                                                                                                |
| GO:0034109        | homotypic cell-cell adhesion                                                 | 6.79E-04    | 6.79E-03                                        | 6.79E-04     | 3.40E-03                                         | Group5   | [HSPB1, ITGA2B, PLEK, VCL]                                                                                                                   |
| GO:0070527        | platelet aggregation                                                         | 1.66E-04    | 2.48E-03                                        | 6.79E-04     | 3.40E-03                                         | Group5   | [HSPB1, ITGA2B, PLEK, VCL]                                                                                                                   |
| GO:0034340        | response to type I interferon                                                | 5.91E-04    | 7.09E-03                                        | 5.91E-04     | 3.55E-03                                         | Group6   | [GBP2, IFIT2, IFIT3, ISG20]                                                                                                                  |
| GO:0071357        | cellular response to type I interferon                                       | 4.74E-04    | 6.16E-03                                        | 5.91E-04     | 3.55E-03                                         | Group6   | [GBP2, IFIT2, IFIT3, ISG20]                                                                                                                  |
| GO:0060337        | type I interferon signaling pathway                                          | 4.74E-04    | 6.16E-03                                        | 5.91E-04     | 3.55E-03                                         | Group6   | [GBP2, IFIT2, IFIT3, ISG20]                                                                                                                  |
| GO:1902622        | regulation of neutrophil migration                                           | 1.04E-03    | 7.29E-03                                        | 2.46E-04     | 1.72E-03                                         | Group7   | [C3AR1, PPBP, RNASE1]                                                                                                                        |
| GO:1990266        | neutrophil migration                                                         | 1.48E-04    | 2.36E-03                                        | 2.46E-04     | 1.72E-03                                         | Group7   | [C3AR1, LGALS3, PECAM1, PPBP, RNASE1]                                                                                                        |
| GO:0030593        | neutrophil chemotaxis                                                        | 1.06E-03    | 6.38E-03                                        | 2.46E-04     | 1.72E-03                                         | Group7   | [C3AR1, LGALS3, PPBP, RNASE1]                                                                                                                |
| GO:0071622        | regulation of granulocyte chemotaxis                                         | 1.69E-03    | 5.07E-03                                        | 2.46E-04     | 1.72E-03                                         | Group7   | [C3AR1, PPBP, RNASE1]                                                                                                                        |
| GO:1902624        | positive regulation of neutrophil migration                                  | 6.99E-04    | 6.29E-03                                        | 2.46E-04     | 1.72E-03                                         | Group7   | [C3AR1, PPBP, RNASE1]                                                                                                                        |
| GO:0071624        | positive regulation of granulocyte chemotaxis                                | 6.17E-04    | 6.78E-03                                        | 2.46E-04     | 1.72E-03                                         | Group7   | [C3AR1, PPBP, RNASE1]                                                                                                                        |
| GO:0090022        | regulation of neutrophil chemotaxis                                          | 6.99E-04    | 6.29E-03                                        | 2.46E-04     | 1.72E-03                                         | Group7   | [C3AR1, PPBP, RNASE1]                                                                                                                        |
| GO:0090023        | positive regulation of neutrophil chemotaxis                                 | 4.71E-04    | 6.60E-03                                        | 2.46E-04     | 1.72E-03                                         | Group7   | [C3AR1, PPBP, RNASE1]                                                                                                                        |
| <b>CD14Mono-3</b> |                                                                              |             |                                                 |              |                                                  |          |                                                                                                                                              |
| GO:0061082        | myeloid leukocyte cytokine production                                        | 7.55E-05    | 6.27E-03                                        | 7.55E-05     | 1.51E-04                                         | Group0   | [BCL6, CD36, FCER1G, IRAK3]                                                                                                                  |
| GO:2000107        | negative regulation of leukocyte apoptotic process                           | 9.98E-05    | 8.18E-03                                        | 9.98E-05     | 9.98E-05                                         | Group1   | [BCL6, CCR7, FCER1G, IRF7, TSC22D3]                                                                                                          |
| GO:0002526        | acute inflammatory response                                                  | 1.10E-05    | 9.56E-04                                        | 1.10E-05     | 5.50E-05                                         | Group2   | [ALOX5AP, C5AR2, CAPG, CCR7, CD6, CFP, CSRP1, FCER1G, IGKC, TIMP1, TREM1]                                                                    |
| GO:0002576        | platelet degranulation                                                       | 3.80E-10    | 3.61E-08                                        | 3.80E-10     | 3.04E-09                                         | Group3   | [APLP2, APP, CD36, CD63, CFD, CFP, F13A1, FCER1G, PLEK, SPARC, TAGLN2, TIMP1, TUBA4A]                                                        |
| GO:007229         | integrin-mediated signaling pathway                                          | 5.74E-05    | 4.82E-03                                        | 5.74E-05     | 1.72E-04                                         | Group4   | [BST1, CD63, FCER1G, ITGB1, ITGB7, PLEK, TIMP1]                                                                                              |
| GO:0009615        | response to virus                                                            | 2.26E-05    | 1.94E-03                                        | 2.26E-05     | 9.03E-05                                         | Group5   | [CXCR4, GBP1, IFI44L, IFIT3, IFITM1, IFNGR2, IRAK3, IRF7, OASL, RNASE2, SEC14L1, UNC93B1]                                                    |
| GO:0051607        | defense response to virus                                                    | 2.86E-05    | 2.43E-03                                        | 2.26E-05     | 9.03E-05                                         | Group5   | [GBP1, IFI44L, IFIT3, IFITM1, IFNGR2, IRF7, OASL, RNASE2, SEC14L1, UNC93B1]                                                                  |
| GO:0002237        | response to molecule of bacterial origin                                     | 7.56E-06    | 6.66E-04                                        | 7.56E-06     | 4.54E-05                                         | Group6   | [AKIRIN2, CCR7, CD36, CD6, CSF2RB, IRAK3, JUNB, MGST1, NFKBIA, PTGER2, SPARC, TIMP1, TNFRSF1B, ZFP36]                                        |
| GO:0032496        | response to lipopolysaccharide                                               | 4.32E-06    | 3.85E-04                                        | 7.56E-06     | 4.54E-05                                         | Group6   | [AKIRIN2, CCR7, CD36, CD6, CSF2RB, IRAK3, JUNB, MGST1, NFKBIA, PTGER2, SPARC, TIMP1, TNFRSF1B, ZFP36]                                        |
| GO:0036230        | granulocyte activation                                                       | 2.31E-08    | 2.10E-06                                        | 3.28E-08     | 2.30E-07                                         | Group7   | [BST1, CD36, CD63, CD68, CD93, CFD, CFP, CKAP4, FCER1G, FGL2, FPR2, GLIPR1, GNS, LAMTOR2, LTA4H, MGST1, QPCT, RNASE2, SELL, TIMP1, TNFRSF1B] |
| GO:0002446        | neutrophil mediated immunity                                                 | 2.37E-08    | 2.13E-06                                        | 3.28E-08     | 2.30E-07                                         | Group7   | [BST1, CD36, CD63, CD68, CD93, CFD, CFP, CKAP4, FCER1G, FGL2, FPR2, GLIPR1, GNS, LAMTOR2, LTA4H, MGST1, QPCT, RNASE2, SELL, TIMP1, TNFRSF1B] |
| GO:0042119        | neutrophil activation                                                        | 1.93E-08    | 1.78E-06                                        | 3.28E-08     | 2.30E-07                                         | Group7   | [BST1, CD36, CD63, CD68, CD93, CFD, CFP, CKAP4, FCER1G, FGL2, FPR2, GLIPR1, GNS, LAMTOR2, LTA4H, MGST1, QPCT, RNASE2, SELL, TIMP1, TNFRSF1B] |
| GO:0002283        | neutrophil activation involved in immune response                            | 1.38E-08    | 1.28E-06                                        | 3.28E-08     | 2.30E-07                                         | Group7   | [BST1, CD36, CD63, CD68, CD93, CFD, CFP, CKAP4, FCER1G, FGL2, FPR2, GLIPR1, GNS, LAMTOR2, LTA4H, MGST1, QPCT, RNASE2, SELL, TIMP1, TNFRSF1B] |
| GO:0043312        | neutrophil degranulation                                                     | 1.27E-08    | 1.19E-06                                        | 3.28E-08     | 2.30E-07                                         | Group7   | [BST1, CD36, CD63, CD68, CD93, CFD, CFP, CKAP4, FCER1G, FGL2, FPR2, GLIPR1, GNS, LAMTOR2, LTA4H, MGST1, QPCT, RNASE2, SELL, TIMP1, TNFRSF1B] |
| <b>CD14Mono-4</b> |                                                                              |             |                                                 |              |                                                  |          |                                                                                                                                              |
| GO:0001836        | release of cytochrome c from mitochondria                                    | 2.16E-04    | 5.62E-03                                        | 2.16E-04     | 1.08E-03                                         | Group0   | [ARRB2, JUN, LMNA, TNFSF10]                                                                                                                  |
| GO:0003151        | outflow tract morphogenesis                                                  | 6.05E-03    | 6.05E-03                                        | 6.05E-03     | 6.05E-03                                         | Group1   | [CXCR4, JUN, NR3C1]                                                                                                                          |
| GO:0070373        | negative regulation of ERK1 and ERK2 cascade                                 | 3.57E-04    | 8.20E-03                                        | 3.57E-04     | 7.13E-04                                         | Group2   | [DUSP3, DUSP6, GBP1, GSTP1]                                                                                                                  |
| GO:0071277        | cellular response to calcium ion                                             | 6.05E-03    | 6.05E-03                                        | 6.05E-03     | 6.05E-03                                         | Group3   | [ALOX5AP, JUN, JUNB]                                                                                                                         |
| GO:0050858        | negative regulation of antigen receptor-mediated signaling pathway           | 3.53E-04    | 8.48E-03                                        | 3.53E-04     | 1.06E-03                                         | Group4   | [DUSP3, GBP1, LILRB4]                                                                                                                        |
| GO:0050860        | negative regulation of T cell receptor signaling pathway                     | 2.29E-04    | 5.71E-03                                        | 3.53E-04     | 1.06E-03                                         | Group4   | [DUSP3, GBP1, LILRB4]                                                                                                                        |
| GO:0032692        | negative regulation of interleukin-1 production                              | 4.13E-04    | 9.09E-03                                        | 3.13E-04     | 1.25E-03                                         | Group5   | [ARRB2, GSTP1, TNFAIP3]                                                                                                                      |
| GO:1903556        | negative regulation of tumor necrosis factor superfamily cytokine production | 1.01E-04    | 2.84E-03                                        | 3.13E-04     | 1.25E-03                                         | Group5   | [ARRB2, GSTP1, RPSA, TNFAIP3]                                                                                                                |
| GO:0032691        | negative regulation of interleukin-1 beta production                         | 1.70E-04    | 4.58E-03                                        | 3.13E-04     | 1.25E-03                                         | Group5   | [ARRB2, GSTP1, TNFAIP3]                                                                                                                      |
| GO:0032720        | negative regulation of tumor necrosis factor production                      | 8.97E-05    | 2.60E-03                                        | 3.13E-04     | 1.25E-03                                         | Group5   | [ARRB2, GSTP1, RPSA, TNFAIP3]                                                                                                                |
| <b>CD16Mono</b>   |                                                                              |             |                                                 |              |                                                  |          |                                                                                                                                              |
| GO:0070373        | negative regulation of ERK1 and ERK2 cascade                                 | 5.97E-04    | 5.97E-04                                        | 5.97E-04     | 5.97E-04                                         | Group0   | [DUSP6, GBP1, KLF4]                                                                                                                          |
| GO:0034340        | response to type I interferon                                                | 1.36E-06    | 5.45E-06                                        | 1.36E-06     | 4.09E-06                                         | Group1   | [IFI6, IFIT2, IFIT3, IRF1, RSAD2]                                                                                                            |
| GO:0071357        | cellular response to type I interferon                                       | 1.02E-06    | 5.10E-06                                        | 1.36E-06     | 4.09E-06                                         | Group1   | [IFI6, IFIT2, IFIT3, IRF1, RSAD2]                                                                                                            |
| GO:0060337        | type I interferon signaling pathway                                          | 1.02E-06    | 5.10E-06                                        | 1.36E-06     | 4.09E-06                                         | Group1   | [IFI6, IFIT2, IFIT3, IRF1, RSAD2]                                                                                                            |
| GO:0002920        | regulation of humoral immune response                                        | 3.19E-07    | 2.24E-06                                        | 1.63E-06     | 3.25E-06                                         | Group2   | [C1QA, C2, C3AR1, FCGR2A, IGKC, SERPING1]                                                                                                    |
| GO:2000257        | regulation of protein activation cascade                                     | 4.02E-06    | 8.04E-06                                        | 1.63E-06     | 3.25E-06                                         | Group2   | [C1QA, C2, C3AR1, IGKC, SERPING1]                                                                                                            |
| GO:0002673        | regulation of acute inflammatory response                                    | 8.85E-07    | 5.31E-06                                        | 1.63E-06     | 3.25E-06                                         | Group2   | [C1QA, C2, C3AR1, FCGR2A, IGKC, SERPING1]                                                                                                    |
| GO:0030449        | regulation of complement activation                                          | 3.59E-06    | 1.08E-05                                        | 1.63E-06     | 3.25E-06                                         | Group2   | [C1QA, C2, C3AR1, IGKC, SERPING1]                                                                                                            |

Supplemental Table 6. 29 genes differentially expressed in the scRNA-seq data used for cross-validation against bulk RNA-seq data

| Gene      | mean_sepsis | mean_ARDS | t-test P value |
|-----------|-------------|-----------|----------------|
| ATP2B1    | -1.17       | -0.58     | 4.73E-08       |
| C1orf56   | -1.08       | -0.57     | 3.86E-06       |
| C3AR1     | 0.55        | 0.10      | 8.05E-03       |
| CDC42SE1  | -0.45       | -0.33     | 1.18E-01       |
| CLEC4E    | -0.22       | -0.56     | 3.44E-03       |
| CLTC      | -0.57       | -0.57     | 9.64E-01       |
| CRISPLD2  | -0.24       | -0.07     | 2.03E-01       |
| GBP2      | 1.12        | 0.17      | 4.67E-04       |
| GNG11     | -0.74       | -0.56     | 1.59E-02       |
| GNS       | 2.04        | 3.72      | 6.33E-14       |
| HIST1H2AC | 0.17        | -0.57     | 8.00E-07       |
| HSPB1     | 1.02        | -0.54     | 2.48E-07       |
| MAP3K7CL  | 0.71        | -0.48     | 8.20E-07       |
| MARCKS    | 2.00        | -0.25     | 9.24E-15       |
| MBOAT7    | 0.18        | -0.31     | 3.62E-06       |
| MMD       | -0.60       | -0.44     | 1.23E-04       |
| MYL9      | -1.26       | -0.58     | 4.29E-08       |
| NRGN      | -0.95       | -0.58     | 4.80E-05       |
| NT5C3A    | 0.09        | 0.01      | 6.88E-01       |
| NUP214    | 0.39        | 0.30      | 5.47E-01       |
| PK4       | -1.08       | 0.01      | 1.51E-07       |
| PDLIM7    | -0.26       | -0.54     | 5.79E-03       |
| PLEK      | 1.46        | 0.13      | 4.41E-08       |
| RAB11A    | 0.60        | 2.34      | 2.33E-21       |
| RAB11FIP1 | -1.33       | -0.36     | 6.28E-10       |
| SPARC     | -1.22       | -0.59     | 1.47E-06       |
| TUBA4A    | -0.41       | -0.25     | 5.04E-02       |
| VNN2      | 0.05        | 0.08      | 8.01E-01       |
| YWHAH     | 1.21        | 1.87      | 5.01E-10       |

\*Expression profile of the 29 genes in GEO datasets. The values were standardized and normalized.

The third column shows P values in t test between the expression levels of the two groups of patients for each gene.

Genes highlighted show similar trends in scRNA-seq and bulk RNA-seq data.

Supplemental Table 7. Description of datasets used for score generation

| GEO dataset | Description                                                                                         | Sample size (used in this analysis) | Platform*                                    |
|-------------|-----------------------------------------------------------------------------------------------------|-------------------------------------|----------------------------------------------|
| GSE89953    | Human Peripheral Blood Monocytes from patients with ARDS at baseline                                | N=26 ARDS patients                  | Illumina HumanRef-8 BeadChip                 |
| GSE46955    | Human Blood Monocytes from gram-negative sepsis patients during sepsis and following their recovery | N=8 patients with sepsis;           | Illumina humanRef-8 v2.0 expression beadchip |

\* The two datasets have comparable preprocessing and normalization in spite of slightly different platforms.

**Supplemental Table 8. Reagents and Materials**

| <b>Reagents</b>                                  | <b>Company</b>    | <b>Catalog Number</b> |
|--------------------------------------------------|-------------------|-----------------------|
| Phosphate-buffered saline (PBS)                  | Fisher Scientific | BW17516Q12            |
| Ficoll Paque PLUS                                | GE Healthcare     | 17144002              |
| Dimethyl Sulfoxide                               | Sigma-Aldrich     | D2650                 |
| Fetal Bovine Serum(FBS)                          | Benchmark         | 100106                |
| X-VIVO15 medium                                  | Lonza             | 04744Q                |
| RPMI medium                                      | ATCC              | 30-2001               |
| Human AB serum                                   | Fisher Scientific | ICN2938249            |
| 2-mercaptoethanol                                | Gibco             | 21985-023             |
| Bovine Serum Albumin (BSA)                       | Gibco             | 15260037              |
| Chromium Single Cell 3' Library & Gel Bead Kit   | 10x Genomics      | 120267                |
| Chromium Single Cell A Chip Kit, 48 runs         | 10x Genomics      | 120236                |
| RBC lysis buffer                                 | BioLegend         | 420301                |
| Acid citrate dextrose blood collection tube      | Fisher Scientific | 02-684-26             |
| 50ml Falcon tube                                 | ThermoFisher      | 352098                |
| 5ml Falcon staining tube                         | Fisher Scientific | 14-959-5              |
| Nalgene Cryo 1 <sup>o</sup> C freezing container | ThermoFisher      | 5100-0001             |
